# Supplementary material for: Phenobarbital Induces Progressive Patterns of GC-Rich and Gene-Specific Altered DNA Methylation in the Liver of Tumor-Prone B6C3F1 Mice
Source: Oxford University Press journal article supplement (doi:10.1093/toxsci/kfj155), 2006-03-14
Supplement: kfj155_Supplementary_Data.zip [file kfj155_Supplementary_Data.zip]

Archive with 2 entries (2 files):
- kfj155supp.doc
- kfj155supp.pdf
